# Supplementary material for: Late steps in cytoplasmic maturation of assembly-competent axonemal outer arm dynein in Chlamydomonas require interaction of ODA5 and ODA10 in a complex
Source: PubMed Central journal article supplement — Mol Biol Cell. 2015 Oct 15;26(20):3596–605. doi: 10.1091/mbc.E15-05-0317 (PMC4603930; doi:10.1091/mbc.e15-05-0317), 2015-10-15
Supplement: supp_E15-05-0317v1_CombinedSupMats.pdf [file supp_E15-05-0317v1_CombinedSupMats.pdf]

# Supplemental Materials

*Molecular Biology of the Cell*

Dean and Mitchell

## Supplemental Figures 1-4

Dean and Mitchell

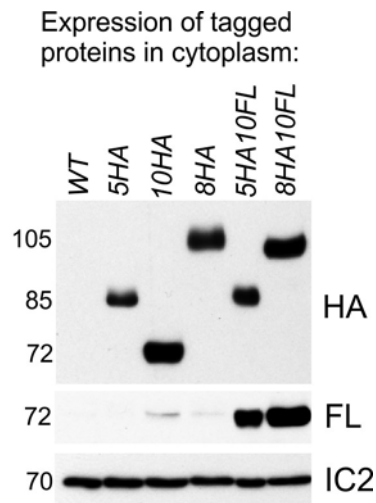

**Supplemental Figure S1. Expression of tagged proteins.** Blots of cell extracts demonstrate the level of expression of transgenes encoding HA-tagged ODA5, ODA10, and ODA8 (upper panel), and Flag-His tagged ODA10 (middle panel) relative to endogenous IC2 (bottom panel). Note that ODA5HA expression levels are lower than ODA10HA expression levels, and that in the *ODA5HA, ODA10FL* strain the lower level of ODA5HA results in a lower level of ODA10FL as well. Faint bands in the *10HA* and *8HA* lanes of the anti-Flag panel show the presence of an unrelated endogenous protein, which cross-reacts with the anti-Flag M2 antibody (see Supplemental Fig. S2). All transgenes are expressed in the background of strains that are null for the endogenous copy of the gene encoding the tagged protein.

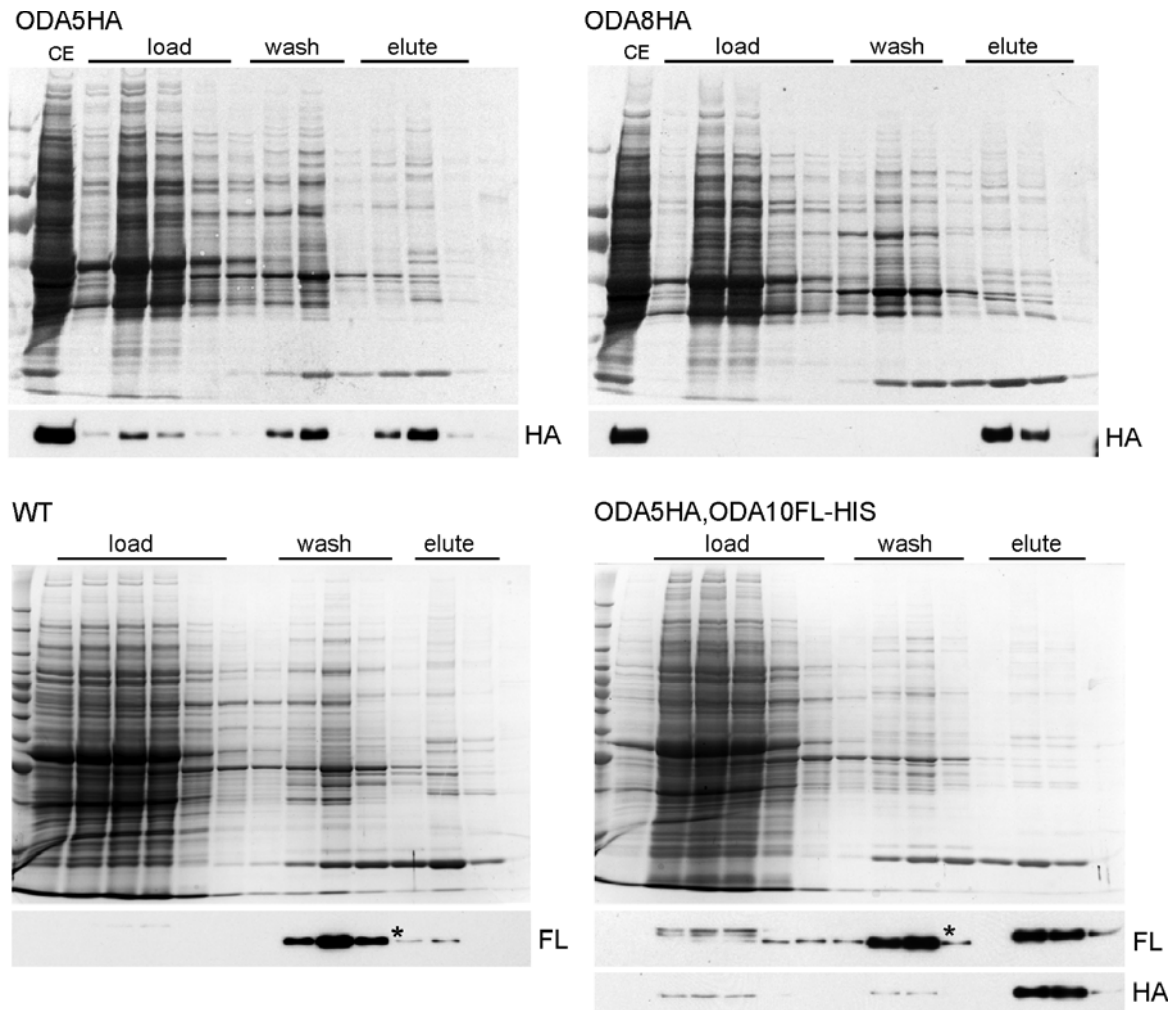

**Supplemental Figure S2. Fractionation of cytoplasmic extracts on Ni-NTA columns.** CE, total cell extract; load, proteins that did not bind (5 mM imidazole); wash, proteins eluted with 13 mM imidazole; elute, proteins eluted with 52 mM imidazole. Top panels, elution of ODA5HA and ODA8HA when ODA10 is not tagged with 6xHIS. Bottom panels, untagged wild type extracts and double-tagged ODA5HAODA10FL extracts, showing the elution of a non-specific Flag-positive band (\*) in the wash, and co-elution of ODA5HA and ODA10FL at 52 mM imidazole. The upper portion of each panel is an 8% acrylamide gel (Coomassie blue stain), lower portions are immunoblots probed with the indicated antibodies. Anti-Flag blots (FL) only show bands in the region of 60-100 kDa; additional bands representing untagged endogenous proteins appear at other molecular weights.

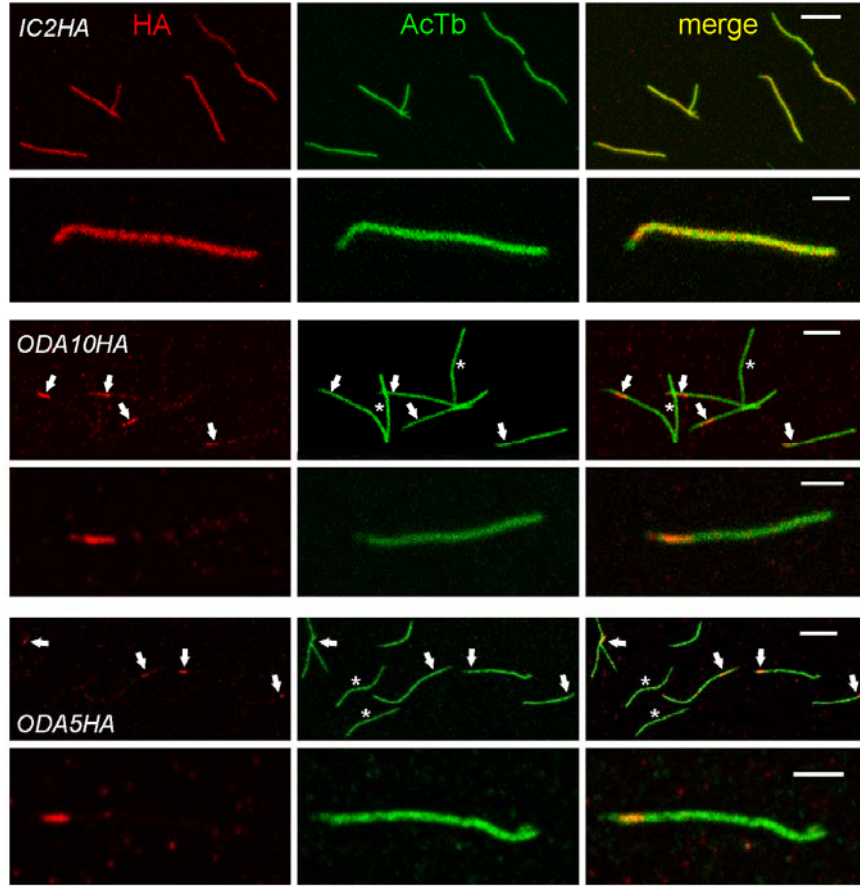

**Supplemental Figure S3. Distribution of ODA10HA and ODA5HA on isolated axonemes.** IF images of isolated axonemes showing the distribution of HA (red), acetylated tubulin (green) and merged images. Top panels, *oda6,IC2HA* axonemes demonstrate the specificity of anti-HA staining of ODAs, which extend along the entire axoneme except the distal tip. Middle panels, *oda10,ODA10HA* axonemes show that HA staining is visible on most axonemes (arrows) but not all (asterisks) and is limited to a region near one end of the axoneme. Bottom panels, *oda5,ODA5HA* axonemes show a similar distribution of label to that seen in *oda10,ODA10HA* axonemes. Scale bars = 5  $\mu\text{m}$  in low-magnification images, 2  $\mu\text{m}$  in high magnification images.

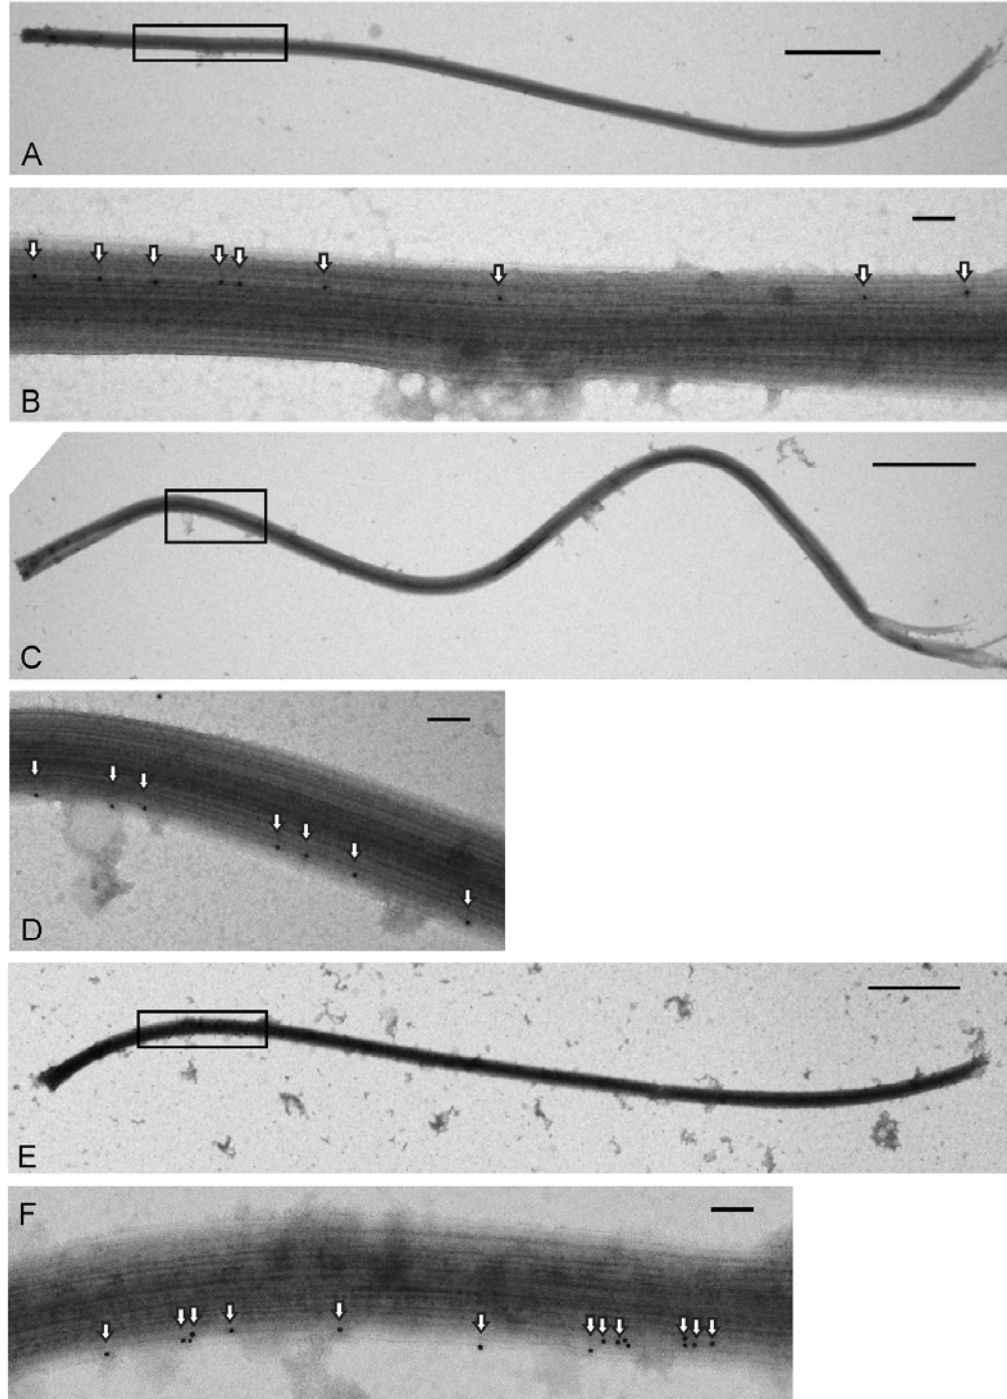

**Supplemental Figure S4. Distribution ODA5HA on wild type axonemes and ODA10HA on *oda9* axonemes.** Negative stain TEM images of immunogold labeled axonemes demonstrate the distribution of ODA5HA along a single doublet microtubule in an *oda5, ODA5HA* strain (A-D), and the similar distribution of ODA10HA in the absence of ODAs in an *oda9, oda10, ODA10HA* strain (E-F). Boxed regions near the proximal ends of axonemes in A, C and E are shown enlarged in B, D and F, where gold particles are highlighted with arrows. Scale bar = 1 μm in A, C and E and 100 nm in B, D and F.
